# Supplementary material for: Biological effects related to exposure to polychlorinated biphenyl (PCB) and decabromodiphenyl ether (BDE-209) on cats
Source: PLoS One. 2023 Jan 20;18(1):e0277689. doi: 10.1371/journal.pone.0277689 (PMC9858064; doi:10.1371/journal.pone.0277689)
Supplement: S3 Table — (XLSX) [file pone.0277689.s003.xlsx]

## Sheet: S3 Table. 
S3 Table. Comparison of the range, mean and median values of biochemical parameters and steroid hormones in the serum of the control cats and PCB treated cats for all time courses. (LD: lower limit of detction).
Biochemical parameter	Control group (n=4)			PCB treated group (n=4)
	Range	Mean	Median	Range	Mean	Median
Total bilirubin (mg/dL)	LD-0.3	0.2	0.2	LD-0.5	0.3	0.2
Total protein (g/dL)	5.5-9.4	7	6.85	5.2-8.3	6.5	6.3
Albumin (g/dL)	2.6-3.9	3.1	3.2	2.5-3.6	2.9	2.9
LDH (IU/L)	LD-356	194.4	187	132-414	217.8	196
GOT (IU/L)	LD-28	16.3	14	LD-29	16.3	15.5
GPT (IU/L)	LD-118	41.4	18	LD-50	22.1	17
BUN (mg/dL)	23-69	34.8	33	22-74	38.8	33
Creatinine (mg/dL)	1-2.3	1.4	1.4	0.9-2.5	1.5	1.4
HDL (mg/dL)	67-135	92.4	92	70-150	106.8	107
Total cholesterol (mg(dL)	109-240	160.2	151.5	104-254	170.7	160
Triglycerides (mg/dL)	33-121	59.9	45	33-129	58.6	54
11-deoxycorticosterone (ng/mL)	LD-0.17	LD	LD	LD-0.1	LD	LD
11-deoxycortisol (ng/mL)	0.1-0.9	0.4	0.3	0.2-0.6	0.3	0.3
Corticosterone (ng/mL)	0.1-1.8	0.5	0.4	0.2-1.2	0.5	0.5
Cortisol (ng/mL)	2.9-79.9	19.5	9.5	1.9-52.0	15	9.4
21-deoxycortisol (ng/mL)	LD	LD	LD	LD	LD	LD
Aldosterone (ng/mL)	LD	LD	LD	LD	LD	LD
Cortisone (ng/mL)	LD	LD	LD	LD	LD	LD
17α-OH-progesterone (ng/mL)	LD-0.1	LD	LD	LD-0.1	LD	LD
Androstenedione (ng/mL)	1.7-11.2	5.8	5.6	2.6-10.2	6.2	6.5
Progesterone (ng/mL)	0.1-0.3	0.2	0.1	0.1-0.3	0.1	0.1
Testosterone (ng/mL)	0.6-5.2	2.9	2.5	1.3-5.7	3	2.7
