# Supplementary material for: Biological effects related to exposure to polychlorinated biphenyl (PCB) and decabromodiphenyl ether (BDE-209) on cats
Source: PLoS One. 2023 Jan 20;18(1):e0277689. doi: 10.1371/journal.pone.0277689 (PMC9858064; doi:10.1371/journal.pone.0277689)
Supplement: S5 Table — (XLSX) [file pone.0277689.s005.xlsx]

## Sheet: S5 Table.
S5 Table. Comparison of the range, mean and median values of biochemical parameters in the serum of the control cats and BDE-209 treated cats for all time courses.
Biochemical parameter	Control group (n=3)			BDE-209 treated group (n=3)
	Range	Mean	Median	Range	Mean	Median
Total bilirubin (mg/dL)	LD-0.7	0.3	0.3	LD-0.8	0.4	0.35
Total protein (g/dL)	5.5-8.6	6.4	6.4	5.6-7.3	6.4	6.3
Albumin (g/dL)	LD-3.5	2.9	2.9	LD-3.2	2.8	2.9
LDH (IU/L)	130-351	192.3	171	132-450	182.6	164
GOT (IU/L)	LD-94	28.7	20	LD-39	19.3	16.5
GPT (IU/L)	21-213	71.4	53	37-132	70	68
BUN (mg/dL)	21-36	28.1	27	26-34	30.6	31
Creatinine (mg/dL)	LD-2.7	1.5	1.6	LD-2.1	1.5	1.5
HDL (mg/dL)	72-150	110.5	101	86-150	133.4	144
Total cholesterol (mg(dL)	98-217	141	131	119-226	163.5	165
Triglycerides (mg/dL)	LD-49	33.2	32.5	LD-79	40.4	37
